# Supplementary material
Source: publisher site journal article supplement (https://www.dovepress.com/article/600787)
Supplement: Supplementary file 1 [file 600787%20Supplementary%20Material.pdf]

## **Additional file 1. Psychological and Sleep Quality Assessment Scales**

### **Pittsburgh Sleep Quality Index (PSQI)**

Instructions: The Pittsburgh Sleep Quality Index (PSQI) assesses sleep quality over the past month. It consists of 19 self-rated items generating seven component scores. Each component is scored from 0 (no difficulty) to 3 (severe difficulty), yielding a global score ranging from 0 to 21.

#### **Component 1. Subjective Sleep Quality**

- 0 = Very good
- 1 = Fairly good
- 2 = Fairly bad
- 3 = Very bad

#### **Component 2. Sleep Latency**

- 0 = ≤15 minutes
- 1 = 16–30 minutes
- 2 = 31–60 minutes
- 3 = >60 minutes

#### **Component 3. Sleep Duration**

- 0 = ≥7 hours
- 1 = 6–7 hours
- 2 = 5–6 hours
- 3 = <5 hours

#### **Component 4. Habitual Sleep Efficiency**

- 0 = ≥85%
- 1 = 75–84%
- 2 = 65–74%
- 3 = <65%

#### **Component 5. Sleep Disturbances**

- 0 = Not during the past month
- 1 = Less than once a week
- 2 = Once or twice a week
- 3 = Three or more times a week

#### **Component 6. Use of Sleeping Medication**

- 0 = Not during the past month
- 1 = Less than once a week
- 2 = Once or twice a week
- 3 = Three or more times a week

#### **Component 7. Daytime Dysfunction**

- 0 = No problem

- 1 = Slight problem
- 2 = Moderate problem
- 3 = Severe problem

## **Montgomery–Åsberg Depression Rating Scale (MADRS)**

Instructions: Rate each item based on the severity of symptoms during the past 7 days. Each item is scored from 0 (no symptoms) to 6 (severe symptoms).

### **1. Apparent Sadness**

- 0 = No sadness
- 2 = Looks dispirited but brightens without difficulty
- 4 = Appears sad and unhappy most of the time
- 6 = Appears miserable all the time; extremely depressed

### **2. Reported Sadness**

- 0 = Occasional sadness only
- 2 = Sad or low but able to enjoy things
- 4 = Persistent sadness, difficulty enjoying activities
- 6 = Continuous, overwhelming sadness

### **3. Inner Tension**

- 0 = Calm, no inner tension
- 2 = Occasional feelings of unease
- 4 = Continuous inner tension or anxiety
- 6 = Unbearable anxiety or panic

### **4. Reduced Sleep**

- 0 = Normal sleep
- 2 = Slight difficulty falling asleep
- 4 = Reduced or disturbed sleep
- 6 = Severe insomnia

### **5. Reduced Appetite**

- 0 = Normal appetite
- 2 = Slight reduction in appetite
- 4 = Marked reduction in appetite
- 6 = Requires persuasion to eat

### **6. Concentration Difficulties**

- 0 = No difficulty concentrating
- 2 = Occasional difficulty
- 4 = Sustained difficulty concentrating
- 6 = Unable to concentrate at all

### **7. Lassitude**

- 0 = Normal energy
- 2 = Tires more easily
- 4 = Marked fatigue

6 = Unable to initiate activities

### **8. Inability to Feel**

0 = Normal emotional involvement

2 = Reduced ability to enjoy

4 = Very limited emotional response

6 = Complete emotional numbness

### **9. Pessimistic Thoughts**

0 = No pessimism

2 = Occasional self-doubt

4 = Persistent pessimism

6 = Delusional guilt or hopelessness

### **10. Suicidal Thoughts**

0 = Enjoys life

2 = Weary of life

4 = Frequent thoughts of death

6 = Explicit suicidal plans or attempts

## Hamilton Anxiety Rating Scale (HAMA)

Instructions: Rate each item from 0 (not present) to 4 (severe), based on anxiety symptoms during the past week.

### 1. Anxious Mood

- 0 = Absent
- 1 = Mild
- 2 = Moderate
- 3 = Severe
- 4 = Very severe

### 2. Tension

- 0 = Absent
- 1 = Mild
- 2 = Moderate
- 3 = Severe
- 4 = Very severe

### 3. Fears

- 0 = Absent
- 1 = Mild
- 2 = Moderate
- 3 = Severe
- 4 = Very severe

### 4. Insomnia

- 0 = No difficulty
- 1 = Mild
- 2 = Moderate
- 3 = Severe
- 4 = Very severe

### 5. Intellectual (Cognitive)

- 0 = No difficulty
- 1 = Mild
- 2 = Moderate
- 3 = Severe
- 4 = Very severe

### 6. Depressed Mood

- 0 = Absent
- 1 = Mild
- 2 = Moderate
- 3 = Severe
- 4 = Very severe

### 7. Somatic (Muscular)

- 0 = Absent

- 1 = Mild
- 2 = Moderate
- 3 = Severe
- 4 = Very severe

### **8. Somatic (Sensory)**

- 0 = Absent
- 1 = Mild
- 2 = Moderate
- 3 = Severe
- 4 = Very severe

### **9. Cardiovascular Symptoms**

- 0 = Absent
- 1 = Mild
- 2 = Moderate
- 3 = Severe
- 4 = Very severe

### **10. Respiratory Symptoms**

- 0 = Absent
- 1 = Mild
- 2 = Moderate
- 3 = Severe
- 4 = Very severe

### **11. Gastrointestinal Symptoms**

- 0 = Absent
- 1 = Mild
- 2 = Moderate
- 3 = Severe
- 4 = Very severe

### **12. Genitourinary Symptoms**

- 0 = Absent
- 1 = Mild
- 2 = Moderate
- 3 = Severe
- 4 = Very severe

### **13. Autonomic Symptoms**

- 0 = Absent
- 1 = Mild
- 2 = Moderate
- 3 = Severe
- 4 = Very severe

### **14. Behavior at Interview**

- 0 = No abnormality

1 = Mild

2 = Moderate

3 = Severe

4 = Very severe

## Additional file 2. Raw data used in this paper

| NO. | Age | Gender | Weight | Height | BMI | Dex-N2 | Dex-N2         | Dex-N3 | Dex-N3         | PSQI<br>Score | MAD         | Hypno         | Antidepr    | Antipsyc      |              |
|-----|-----|--------|--------|--------|-----|--------|----------------|--------|----------------|---------------|-------------|---------------|-------------|---------------|--------------|
|     |     |        |        |        |     | dose   | dose_group     | dose   | dose_group     |               | RS<br>Score | HAMA<br>Score | tics<br>use | essant<br>use | otics<br>use |
| 1   | 50  | Male   | 650    | 1649   | 239 | 40     | Q3 [39.6,48)   | 641    | Q4 [63.6,76]   | 20            | 20          | 27            | No          | No            | No           |
| 2   | 52  | Female | 800    | 1704   | 276 | 64     | Q4 [48,80]     |        |                | 18            | 13          | 29            | No          | Yes           | Yes          |
| 3   | 54  | Female | 670    | 1705   | 230 | 40     | Q3 [39.6,48)   | 72     | Q4 [63.6,76]   | 19            | 6           | 32            | Yes         | No            | No           |
| 4   | 50  | Male   | 590    | 1644   | 218 | 272    | Q1 [16,32.8)   | 36     | Q1 [32.8,48)   | 13            | 28          | 27            | No          | No            | No           |
| 5   | 48  | Male   | 500    | 1607   | 194 | 32     | Q1 [16,32.8)   | 48     | Q2 [48,54.8)   | 12            | 33          | 25            | Yes         | No            | No           |
| 6   | 70  | Female | 600    | 1714   | 204 | 52     | Q4 [48,80]     | 64     | Q4 [63.6,76]   | 8             | 21          | 20            | No          | Yes           | Yes          |
| 7   | 25  | Male   | 650    | 1660   | 236 | 36     | Q2 [32.8,39.6) | 40     | Q1 [32.8,48)   | 9             | 10          | 4             | No          | No            | No           |
| 8   | 70  | Female | 770    | 1790   | 240 | 512    | Q4 [48,80]     | 74     | Q4 [63.6,76]   | 11            | 20          | 20            | Yes         | No            | No           |
| 9   | 33  | Female | 700    | 1800   | 216 | 30     | Q1 [16,32.8)   | 52     | Q2 [48,54.8)   | 12            | 5           | 9             | No          | No            | No           |
| 10  | 23  | Male   | 500    | 1609   | 193 | 32     | Q1 [16,32.8)   | 54     | Q2 [48,54.8)   | 14            | 14          | 0             | No          | No            | No           |
| 11  | 55  | Male   | 620    | 1580   | 248 | 40     | Q3 [39.6,48)   | 44     | Q1 [32.8,48)   | 15            | 11          | 32            | Yes         | No            | No           |
| 12  | 48  | Female | 635    | 1680   | 225 | 396    | Q3 [39.6,48)   |        |                | 20            | 16          | 25            | No          | No            | No           |
| 13  | 54  | Male   | 640    | 1600   | 250 | 724    | Q4 [48,80]     |        |                | 20            | 49          | 31            | Yes         | Yes           | Yes          |
| 14  | 70  | Male   | 430    | 1600   | 168 | 348    | Q2 [32.8,39.6) | 60     | Q3 [54.8,63.6) | 17            | 19          | 15            | Yes         | No            | No           |
| 15  | 44  | Male   | 700    | 1700   | 242 | 456    | Q3 [39.6,48)   | 668    | Q4 [63.6,76]   | 14            | 12          | 20            | Yes         | Yes           | No           |
| 16  | 60  | Female | 628    | 1713   | 214 | 312    | Q1 [16,32.8)   |        |                | 12            | 6           | 12            | Yes         | Yes           | No           |
| 17  | 18  | Male   | 600    | 1624   | 227 | 44     | Q3 [39.6,48)   | 628    | Q3 [54.8,63.6) | 8             | 7           | 3             | No          | Yes           | Yes          |
| 18  | 47  | Male   | 590    | 1650   | 217 | 328    | Q2 [32.8,39.6) | 432    | Q1 [32.8,48)   | 17            | 16          | 22            | No          | No            | Yes          |
| 19  | 51  | Male   | 520    | 1650   | 191 | 456    | Q3 [39.6,48)   | 584    | Q3 [54.8,63.6) | 19            | 11          | 13            | No          | No            | No           |
| 20  | 42  | Female | 760    | 1714   | 259 | 424    | Q3 [39.6,48)   | 68     | Q4 [63.6,76]   | 13            | 15          | 15            | No          | No            | Yes          |
| 21  | 50  | Female | 645    | 1690   | 226 | 44     | Q3 [39.6,48)   | 60     | Q3 [54.8,63.6) | 21            | 18          | 32            | Yes         | No            | No           |
| 22  | 59  | Male   | 500    | 1580   | 200 | 36     | Q2 [32.8,39.6) | 532    | Q2 [48,54.8)   | 17            | 44          | 46            | No          | Yes           | Yes          |
| 23  | 56  | Male   | 650    | 1640   | 242 | 36     | Q2 [32.8,39.6) | 56     | Q3 [54.8,63.6) | 19            | 17          | 35            | No          | Yes           | No           |
| 24  | 58  | Male   | 500    | 1570   | 203 | 288    | Q1 [16,32.8)   | 488    | Q2 [48,54.8)   | 20            | 25          | 42            | Yes         | Yes           | No           |
| 25  | 42  | Male   | 460    | 1587   | 183 | 44     | Q3 [39.6,48)   | 587    | Q3 [54.8,63.6) | 9             | 11          | 15            | No          | Yes           | No           |
| 26  | 62  | Male   | 520    | 1612   | 200 | 50     | Q4 [48,80]     | 64     | Q4 [63.6,76]   | 11            | 9           | 12            | Yes         | No            | No           |
| 27  | 68  | Male   | 550    | 1600   | 215 | 508    | Q4 [48,80]     | 74     | Q4 [63.6,76]   | 15            | 17          | 16            | No          | Yes           | Yes          |

|    |    |        |     |      |     |     |                |     |                |    |    |    |     |     |     |
|----|----|--------|-----|------|-----|-----|----------------|-----|----------------|----|----|----|-----|-----|-----|
| 28 | 43 | Female | 770 | 1691 | 269 | 58  | Q4 [48,80]     | 688 | Q4 [63.6,76]   | 16 | 12 | 17 | No  | Yes | No  |
| 29 | 54 | Female | 520 | 1720 | 176 | 44  | Q3 [39.6,48)   | 668 | Q4 [63.6,76]   | 16 | 17 | 31 | No  | No  | No  |
| 30 | 59 | Male   | 500 | 1550 | 208 | 352 | Q2 [32.8,39.6) | 432 | Q1 [32.8,48)   | 17 | 15 | 44 | Yes | No  | No  |
| 31 | 66 | Male   | 542 | 1601 | 211 | 352 | Q2 [32.8,39.6) | 52  | Q2 [48,54.8)   | 10 | 14 | 15 | Yes | No  | No  |
| 32 | 58 | Female | 925 | 1701 | 320 | 452 | Q3 [39.6,48)   | 596 | Q3 [54.8,63.6) | 18 | 24 | 42 | No  | Yes | No  |
| 33 | 39 | Female | 650 | 1760 | 210 | 452 | Q3 [39.6,48)   | 52  | Q2 [48,54.8)   | 8  | 1  | 13 | Yes | No  | Yes |
| 34 | 50 | Male   | 540 | 1650 | 198 | 26  | Q1 [16,32.8)   | 44  | Q1 [32.8,48)   | 18 | 24 | 26 | Yes | No  | No  |
| 35 | 49 | Female | 720 | 1730 | 241 | 664 | Q4 [48,80]     |     |                | 15 | 17 | 26 | Yes | No  | No  |
| 36 | 60 | Male   | 560 | 1593 | 221 | 328 | Q2 [32.8,39.6) | 512 | Q2 [48,54.8)   | 17 | 5  | 12 | Yes | No  | Yes |
| 37 | 70 | Male   | 550 | 1616 | 211 |     |                | 50  | Q2 [48,54.8)   | 10 | 26 | 21 | No  | No  | No  |
| 38 | 74 | Male   | 570 | 1619 | 218 |     |                | 588 | Q3 [54.8,63.6) | 17 | 11 | 18 | Yes | Yes | Yes |
| 39 | 36 | Female | 740 | 1680 | 262 | 468 | Q3 [39.6,48)   | 628 | Q3 [54.8,63.6) | 18 | 10 | 10 | Yes | No  | Yes |
| 40 | 67 | Female | 830 | 1770 | 265 | 732 | Q4 [48,80]     |     |                | 12 | 16 | 17 | Yes | Yes | No  |
| 41 | 45 | Female | 600 | 1680 | 213 |     |                | 476 | Q1 [32.8,48)   | 8  | 13 | 20 | No  | No  | No  |
| 42 | 56 | Female | 600 | 1800 | 185 | 32  | Q1 [16,32.8)   | 496 | Q2 [48,54.8)   | 21 | 30 | 33 | Yes | No  | No  |
| 43 | 57 | Male   | 604 | 1625 | 229 | 396 | Q3 [39.6,48)   | 46  | Q1 [32.8,48)   | 10 | 22 | 37 | No  | No  | No  |
| 44 | 59 | Male   | 800 | 1730 | 267 | 328 | Q2 [32.8,39.6) | 476 | Q1 [32.8,48)   | 9  | 24 | 48 | Yes | Yes | Yes |
| 45 | 22 | Male   | 594 | 1631 | 223 | 484 | Q4 [48,80]     | 68  | Q4 [63.6,76]   | 11 | 12 | 0  | No  | No  | Yes |
| 46 | 55 | Female | 660 | 1680 | 234 | 36  | Q2 [32.8,39.6) | 44  | Q1 [32.8,48)   | 14 | 13 | 32 | Yes | No  | Yes |
| 47 | 63 | Female | 600 | 1685 | 211 | 24  | Q1 [16,32.8)   | 384 | Q1 [32.8,48)   | 16 | 11 | 15 | Yes | Yes | No  |
| 48 | 42 | Male   | 550 | 1640 | 204 | 36  | Q2 [32.8,39.6) | 48  | Q2 [48,54.8)   | 11 | 4  | 16 | No  | No  | No  |
| 49 | 44 | Female | 875 | 1710 | 299 | 384 | Q2 [32.8,39.6) | 564 | Q3 [54.8,63.6) | 17 | 28 | 18 | Yes | No  | No  |
| 50 | 48 | Female | 720 | 1710 | 246 | 34  | Q2 [32.8,39.6) | 36  | Q1 [32.8,48)   | 13 | 32 | 25 | No  | No  | No  |
| 51 | 56 | Male   | 485 | 1586 | 193 | 40  | Q3 [39.6,48)   | 56  | Q3 [54.8,63.6) | 15 | 21 | 35 | Yes | No  | No  |
| 52 | 56 | Male   | 400 | 1550 | 166 | 28  | Q1 [16,32.8)   | 52  | Q2 [48,54.8)   | 18 | 5  | 35 | Yes | No  | No  |
| 53 | 55 | Female | 800 | 1719 | 271 | 416 | Q3 [39.6,48)   | 60  | Q3 [54.8,63.6) | 19 | 11 | 14 | No  | Yes | Yes |
| 54 | 28 | Male   | 560 | 1624 | 212 | 284 | Q1 [16,32.8)   | 44  | Q1 [32.8,48)   | 11 | 6  | 5  | Yes | No  | No  |
| 55 | 60 | Female | 500 | 1650 | 184 | 36  | Q2 [32.8,39.6) | 44  | Q1 [32.8,48)   | 9  | 30 | 54 | Yes | Yes | No  |
| 56 | 53 | Male   | 520 | 1626 | 197 | 696 | Q4 [48,80]     | 748 | Q4 [63.6,76]   | 12 | 24 | 30 | No  | Yes | No  |
| 57 | 39 | Male   | 650 | 1663 | 235 |     |                | 66  | Q4 [63.6,76]   | 13 | 10 | 13 | No  | No  | No  |
| 58 | 63 | Female | 725 | 1696 | 252 | 676 | Q4 [48,80]     |     |                | 11 | 11 | 11 | Yes | Yes | No  |
| 59 | 43 | Male   | 600 | 1618 | 229 | 436 | Q3 [39.6,48)   | 588 | Q3 [54.8,63.6) | 14 | 19 | 33 | No  | Yes | No  |
| 60 | 34 | Male   | 525 | 1614 | 202 | 204 | Q1 [16,32.8)   | 356 | Q1 [32.8,48)   | 16 | 10 | 9  | Yes | No  | No  |

|    |    |        |     |      |     |     |                |     |                |    |    |    |     |     |     |
|----|----|--------|-----|------|-----|-----|----------------|-----|----------------|----|----|----|-----|-----|-----|
| 61 | 41 | Female | 750 | 1693 | 262 | 468 | Q3 [39.6,48)   | 64  | Q4 [63.6,76]   | 9  | 10 | 15 | Yes | No  | No  |
| 62 | 60 | Male   | 500 | 1600 | 195 | 30  | Q1 [16,32.8)   | 452 | Q1 [32.8,48)   | 18 | 2  | 12 | No  | No  | No  |
| 63 | 25 | Female | 830 | 1740 | 274 | 396 | Q3 [39.6,48)   | 642 | Q4 [63.6,76]   | 12 | 3  | 4  | Yes | No  | No  |
| 64 | 70 | Female | 650 | 1706 | 223 | 344 | Q2 [32.8,39.6) | 468 | Q1 [32.8,48)   | 15 | 19 | 18 | No  | No  | No  |
| 65 | 71 | Female | 639 | 1700 | 221 | 44  | Q3 [39.6,48)   | 694 | Q4 [63.6,76]   | 10 | 10 | 11 | No  | No  | No  |
| 66 | 39 | Male   | 520 | 1600 | 203 | 312 | Q1 [16,32.8)   | 575 | Q3 [54.8,63.6) | 8  | 12 | 12 | Yes | No  | No  |
| 67 | 43 | Male   | 532 | 1601 | 207 | 388 | Q2 [32.8,39.6) | 52  | Q2 [48,54.8)   | 9  | 15 | 17 | No  | Yes | No  |
| 68 | 66 | Male   | 600 | 1580 | 240 |     |                | 56  | Q3 [54.8,63.6) | 12 | 15 | 15 | No  | No  | No  |
| 69 | 50 | Female | 620 | 1670 | 222 | 44  | Q3 [39.6,48)   | 72  | Q4 [63.6,76]   | 19 | 17 | 27 | Yes | No  | No  |
| 70 | 38 | Male   | 520 | 1615 | 199 | 572 | Q4 [48,80]     | 656 | Q4 [63.6,76]   | 14 | 11 | 11 | Yes | No  | No  |
| 71 | 39 | Female | 630 | 1700 | 218 | 44  | Q3 [39.6,48)   | 56  | Q3 [54.8,63.6) | 10 | 13 | 11 | Yes | Yes | Yes |
| 72 | 56 | Male   | 770 | 1652 | 282 | 508 | Q4 [48,80]     | 544 | Q2 [48,54.8)   | 12 | 24 | 34 | No  | Yes | Yes |
| 73 | 68 | Male   | 640 | 1634 | 240 | 48  | Q4 [48,80]     | 612 | Q3 [54.8,63.6) | 13 | 16 | 16 | No  | Yes | No  |
| 74 | 65 | Female | 600 | 1688 | 211 | 52  | Q4 [48,80]     | 60  | Q3 [54.8,63.6) | 12 | 28 | 30 | No  | Yes | No  |
| 75 | 32 | Male   | 600 | 1620 | 229 | 312 | Q1 [16,32.8)   | 484 | Q2 [48,54.8)   | 14 | 1  | 9  | Yes | No  | No  |
| 76 | 55 | Male   | 650 | 1649 | 239 | 404 | Q3 [39.6,48)   | 488 | Q2 [48,54.8)   | 9  | 15 | 32 | Yes | Yes | No  |
| 77 | 43 | Male   | 470 | 1593 | 185 | 48  | Q4 [48,80]     | 64  | Q4 [63.6,76]   | 13 | 25 | 16 | No  | Yes | No  |
| 78 | 48 | Female | 700 | 1703 | 241 | 56  | Q4 [48,80]     | 64  | Q4 [63.6,76]   | 15 | 21 | 24 | No  | Yes | No  |
| 79 | 26 | Male   | 430 | 1585 | 171 | 396 | Q3 [39.6,48)   | 484 | Q2 [48,54.8)   | 20 | 17 | 4  | Yes | No  | No  |
| 80 | 47 | Male   | 550 | 1615 | 211 | 256 | Q1 [16,32.8)   | 50  | Q2 [48,54.8)   | 19 | 24 | 23 | Yes | No  | Yes |
| 81 | 66 | Female | 657 | 1708 | 225 | 304 | Q1 [16,32.8)   | 44  | Q1 [32.8,48)   | 14 | 13 | 13 | Yes | Yes | No  |
| 82 | 63 | Male   | 546 | 1610 | 211 |     |                | 476 | Q1 [32.8,48)   | 8  | 11 | 16 | No  | No  | No  |
| 83 | 54 | Female | 650 | 1810 | 198 | 292 | Q1 [16,32.8)   | 524 | Q2 [48,54.8)   | 9  | 18 | 31 | Yes | Yes | Yes |
| 84 | 52 | Female | 610 | 1712 | 208 | 44  | Q3 [39.6,48)   | 628 | Q3 [54.8,63.6) | 14 |    | 29 | Yes | No  | No  |
| 85 | 42 | Male   | 560 | 1613 | 215 | 48  | Q4 [48,80]     | 688 | Q4 [63.6,76]   | 11 | 10 | 16 | Yes | No  | No  |
| 86 | 31 | Male   | 500 | 1597 | 196 | 496 | Q4 [48,80]     | 731 | Q4 [63.6,76]   | 14 | 6  | 8  | Yes | No  | No  |
| 87 | 25 | Female | 662 | 1696 | 230 | 364 | Q2 [32.8,39.6) | 452 | Q1 [32.8,48)   | 14 | 15 | 0  | Yes | No  | No  |
| 88 | 47 | Male   | 630 | 1631 | 237 | 34  | Q2 [32.8,39.6) | 48  | Q2 [48,54.8)   | 15 | 11 | 24 | Yes | Yes | No  |
| 89 | 60 | Female | 525 | 1680 | 186 | 504 | Q4 [48,80]     | 62  | Q3 [54.8,63.6) | 14 | 4  | 11 | No  | No  | No  |
| 90 | 59 | Female | 700 | 1710 | 239 | 34  | Q2 [32.8,39.6) | 48  | Q2 [48,54.8)   | 8  | 22 | 46 | Yes | Yes | No  |
| 91 | 78 | Male   | 500 | 1613 | 192 | 60  | Q4 [48,80]     | 72  | Q4 [63.6,76]   | 13 | 11 | 12 | Yes | No  | No  |
| 92 | 42 | Female | 929 | 1725 | 312 | 60  | Q4 [48,80]     | 76  | Q4 [63.6,76]   | 16 | 11 | 16 | No  | No  | No  |
| 93 | 60 | Male   | 630 | 1654 | 230 |     |                | 62  | Q3 [54.8,63.6) | 12 | 6  | 12 | No  | No  | No  |

|     |    |        |     |      |     |     |                |     |                |    |    |    |     |     |     |
|-----|----|--------|-----|------|-----|-----|----------------|-----|----------------|----|----|----|-----|-----|-----|
| 94  | 84 | Female | 702 | 1690 | 246 | 70  | Q4 [48,80]     |     |                | 20 | 13 | 12 | No  | Yes | Yes |
| 95  | 47 | Male   | 640 | 1644 | 237 | 36  | Q2 [32.8,39.6) | 48  | Q2 [48,54.8)   | 13 | 10 | 24 | Yes | No  | No  |
| 96  | 48 | Male   | 500 | 1560 | 205 | 308 | Q1 [16,32.8)   | 552 | Q3 [54.8,63.6) | 17 | 13 | 25 | Yes | No  | Yes |
| 97  | 61 | Male   | 510 | 1595 | 200 | 344 | Q2 [32.8,39.6) | 496 | Q2 [48,54.8)   | 15 | 7  | 12 | No  | No  | No  |
| 98  | 63 | Male   | 600 | 1624 | 227 | 48  | Q4 [48,80]     | 60  | Q3 [54.8,63.6) | 12 | 22 | 29 | Yes | No  | No  |
| 99  | 49 | Male   | 750 | 1642 | 278 | 572 | Q4 [48,80]     | 64  | Q4 [63.6,76]   | 10 | 8  | 26 | Yes | No  | Yes |
| 100 | 44 | Male   | 500 | 1630 | 188 | 296 | Q1 [16,32.8)   | 396 | Q1 [32.8,48)   | 15 | 33 | 19 | No  | Yes | No  |
| 101 | 64 | Male   | 557 | 1598 | 218 | 32  | Q1 [16,32.8)   | 545 | Q2 [48,54.8)   | 18 | 12 | 14 | Yes | No  | No  |
| 102 | 67 | Male   | 550 | 1603 | 214 | 304 | Q1 [16,32.8)   | 552 | Q3 [54.8,63.6) | 12 | 15 | 16 | Yes | Yes | No  |
| 103 | 56 | Male   | 480 | 1560 | 197 | 32  | Q1 [16,32.8)   | 40  | Q1 [32.8,48)   | 20 | 24 | 34 | Yes | Yes | Yes |
| 104 | 49 | Male   | 630 | 1646 | 233 | 364 | Q2 [32.8,39.6) | 56  | Q3 [54.8,63.6) | 15 | 20 | 26 | Yes | Yes | No  |
| 105 | 27 | Female | 700 | 1720 | 237 | 24  | Q1 [16,32.8)   | 64  | Q4 [63.6,76]   | 8  | 2  | 1  | Yes | No  | No  |
| 106 | 49 | Male   | 590 | 1628 | 223 | 448 | Q3 [39.6,48)   | 648 | Q4 [63.6,76]   | 20 | 6  | 26 | Yes | Yes | No  |
| 107 | 30 | Male   | 520 | 1603 | 202 | 408 | Q3 [39.6,48)   | 528 | Q2 [48,54.8)   | 12 | 9  | 5  | Yes | Yes | Yes |
| 108 | 48 | Female | 680 | 1719 | 230 | 736 | Q4 [48,80]     |     |                | 17 | 36 | 25 | Yes | Yes | No  |
| 109 | 60 | Male   | 530 | 1601 | 207 | 28  | Q1 [16,32.8)   | 372 | Q1 [32.8,48)   | 8  | 5  | 12 | No  | No  | No  |
| 110 | 31 | Female | 850 | 1740 | 281 | 332 | Q2 [32.8,39.6) | 416 | Q1 [32.8,48)   | 8  | 1  | 6  | Yes | No  | Yes |
| 111 | 53 | Female | 700 | 1730 | 234 | 476 | Q3 [39.6,48)   | 616 | Q3 [54.8,63.6) | 15 | 8  | 30 | No  | Yes | No  |
| 112 | 37 | Female | 675 | 1720 | 228 | 48  | Q4 [48,80]     | 72  | Q4 [63.6,76]   | 14 | 2  | 11 | Yes | No  | No  |
| 113 | 36 | Male   | 600 | 1629 | 226 | 756 | Q4 [48,80]     |     |                | 11 | 14 | 10 | Yes | No  | No  |
| 114 | 27 | Male   | 550 | 1600 | 215 | 384 | Q2 [32.8,39.6) | 464 | Q1 [32.8,48)   | 10 | 3  | 5  | No  | Yes | Yes |
| 115 | 64 | Male   | 568 | 1607 | 220 | 372 | Q2 [32.8,39.6) | 562 | Q3 [54.8,63.6) | 19 | 12 | 16 | Yes | No  | No  |
| 116 | 62 | Male   | 550 | 1550 | 229 | 32  | Q1 [16,32.8)   | 468 | Q1 [32.8,48)   | 15 | 10 | 17 | Yes | No  | No  |
| 117 | 40 | Male   | 700 | 1650 | 257 | 44  | Q3 [39.6,48)   | 628 | Q3 [54.8,63.6) | 15 | 26 | 13 | Yes | Yes | No  |
| 118 | 33 | Male   | 591 | 1608 | 229 | 48  | Q4 [48,80]     | 66  | Q4 [63.6,76]   | 10 | 10 | 9  | No  | No  | No  |
| 119 | 51 | Female | 700 | 1700 | 242 | 38  | Q2 [32.8,39.6) | 62  | Q3 [54.8,63.6) | 11 | 28 | 28 | Yes | Yes | No  |
| 120 | 51 | Male   | 580 | 1631 | 218 | 30  | Q1 [16,32.8)   | 40  | Q1 [32.8,48)   | 13 | 30 | 27 | No  | Yes | No  |
| 121 | 37 | Male   | 450 | 1605 | 175 | 24  | Q1 [16,32.8)   | 40  | Q1 [32.8,48)   | 8  | 10 | 11 | No  | No  | No  |
| 122 | 22 | Male   | 530 | 1600 | 207 | 34  | Q2 [32.8,39.6) | 56  | Q3 [54.8,63.6) | 8  | 2  | 4  | Yes | No  | No  |
| 123 | 32 | Female | 660 | 1698 | 229 | 48  | Q4 [48,80]     |     |                | 19 | 13 | 8  | Yes | No  | No  |
| 124 | 44 | Male   | 680 | 1649 | 250 | 36  | Q2 [32.8,39.6) | 56  | Q3 [54.8,63.6) | 11 | 16 | 19 | No  | No  | No  |
| 125 | 67 | Male   | 558 | 1599 | 218 | 34  | Q2 [32.8,39.6) | 52  | Q2 [48,54.8)   | 16 | 15 | 16 | No  | Yes | No  |
| 126 | 37 | Female | 678 | 1715 | 231 | 284 | Q1 [16,32.8)   | 476 | Q1 [32.8,48)   | 15 | 7  | 11 | Yes | No  | No  |

|     |    |        |      |      |     |     |                |     |                |    |    |    |     |     |     |
|-----|----|--------|------|------|-----|-----|----------------|-----|----------------|----|----|----|-----|-----|-----|
| 127 | 26 | Female | 625  | 1620 | 238 | 464 | Q3 [39.6,48)   | 584 | Q3 [54.8,63.6) | 13 | 17 | 28 | Yes | No  | No  |
| 128 | 59 | Male   | 730  | 1640 | 271 | 344 | Q2 [32.8,39.6) | 508 | Q2 [48,54.8)   | 18 | 23 | 53 | Yes | Yes | Yes |
| 129 | 38 | Male   | 580  | 1613 | 223 | 48  | Q4 [48,80]     | 56  | Q3 [54.8,63.6) | 14 | 10 | 11 | Yes | Yes | No  |
| 130 | 51 | Female | 530  | 1680 | 188 | 40  | Q3 [39.6,48)   | 50  | Q2 [48,54.8)   | 14 | 33 | 28 | Yes | Yes | No  |
| 131 | 64 | Female | 647  | 1711 | 221 | 324 | Q1 [16,32.8)   | 60  | Q3 [54.8,63.6) | 17 | 12 | 15 | No  | No  | No  |
| 132 | 40 | Male   | 700  | 1649 | 257 | 524 | Q4 [48,80]     | 628 | Q3 [54.8,63.6) | 12 | 4  | 14 | Yes | No  | No  |
| 133 | 42 | Male   | 470  | 1577 | 189 | 544 | Q4 [48,80]     | 664 | Q4 [63.6,76]   | 13 | 15 | 15 | Yes | Yes | No  |
| 134 | 58 | Male   | 700  | 1550 | 291 | 52  | Q4 [48,80]     | 60  | Q3 [54.8,63.6) | 21 | 12 | 13 | Yes | No  | No  |
| 135 | 63 | Male   | 700  | 1635 | 262 | 42  | Q3 [39.6,48)   | 608 | Q3 [54.8,63.6) | 20 | 10 | 13 | Yes | No  | No  |
| 136 | 39 | Male   | 520  | 1580 | 208 | 28  | Q1 [16,32.8)   | 36  | Q1 [32.8,48)   | 10 | 4  | 12 | Yes | No  | No  |
| 137 | 71 | Male   | 455  | 1584 | 181 | 40  | Q3 [39.6,48)   | 50  | Q2 [48,54.8)   | 12 | 13 | 13 | Yes | No  | No  |
| 138 | 41 | Female | 640  | 1707 | 220 | 68  | Q4 [48,80]     | 74  | Q4 [63.6,76]   | 20 | 13 | 14 | Yes | No  | No  |
| 139 | 33 | Female | 668  | 1722 | 226 | 368 | Q2 [32.8,39.6) | 48  | Q2 [48,54.8)   | 10 | 4  | 9  | Yes | No  | No  |
| 140 | 40 | Female | 800  | 1700 | 277 | 60  | Q4 [48,80]     |     |                | 10 | 8  | 14 | Yes | No  | No  |
| 141 | 61 | Female | 580  | 1630 | 218 | 256 | Q1 [16,32.8)   | 328 | Q1 [32.8,48)   | 12 | 7  | 13 | Yes | Yes | No  |
| 142 | 61 | Male   | 549  | 1614 | 211 | 588 | Q4 [48,80]     | 708 | Q4 [63.6,76]   | 9  | 9  | 14 | Yes | No  | No  |
| 143 | 58 | Female | 650  | 1650 | 239 | 36  | Q2 [32.8,39.6) | 53  | Q2 [48,54.8)   | 20 | 21 | 42 | Yes | Yes | No  |
| 144 | 56 | Female | 735  | 1700 | 254 | 384 | Q2 [32.8,39.6) | 592 | Q3 [54.8,63.6) | 20 | 29 | 42 | No  | No  | No  |
| 145 | 56 | Female | 1150 | 1719 | 389 | 404 | Q3 [39.6,48)   | 544 | Q2 [48,54.8)   | 13 | 10 | 34 | Yes | No  | No  |
| 146 | 44 | Male   | 630  | 1638 | 235 | 46  | Q3 [39.6,48)   | 608 | Q3 [54.8,63.6) | 14 | 26 | 18 | Yes | No  | No  |
| 147 | 43 | Female | 700  | 1710 | 239 |     |                | 48  | Q2 [48,54.8)   | 16 | 11 | 17 | No  | No  | No  |
| 148 | 53 | Male   | 560  | 1628 | 211 | 508 | Q4 [48,80]     | 60  | Q3 [54.8,63.6) | 15 | 6  | 9  | Yes | Yes | No  |
| 149 | 48 | Female | 740  | 1707 | 254 | 42  | Q3 [39.6,48)   | 52  | Q2 [48,54.8)   | 12 | 26 | 24 | Yes | Yes | No  |
| 150 | 47 | Male   | 750  | 1700 | 260 | 256 | Q1 [16,32.8)   | 444 | Q1 [32.8,48)   | 18 | 25 | 22 | No  | Yes | No  |
| 151 | 68 | Female | 750  | 1708 | 257 | 48  | Q4 [48,80]     | 632 | Q3 [54.8,63.6) | 14 | 16 | 16 | Yes | No  | No  |
| 152 | 33 | Female | 730  | 1750 | 238 | 50  | Q4 [48,80]     | 60  | Q3 [54.8,63.6) | 20 | 31 | 29 | Yes | Yes | No  |
| 153 | 56 | Male   | 520  | 1600 | 203 | 344 | Q2 [32.8,39.6) | 40  | Q1 [32.8,48)   | 13 | 20 | 32 | Yes | No  | No  |
| 154 | 56 | Male   | 600  | 1650 | 220 | 80  | Q4 [48,80]     |     |                | 11 | 22 | 34 | Yes | Yes | No  |
| 155 | 36 | Male   | 560  | 1604 | 218 | 348 | Q2 [32.8,39.6) | 574 | Q3 [54.8,63.6) | 13 | 7  | 7  | No  | Yes | No  |
| 156 | 77 | Male   | 750  | 1654 | 274 |     |                | 64  | Q4 [63.6,76]   | 15 | 12 | 15 | No  | No  | No  |
| 157 | 40 | Female | 700  | 1708 | 240 | 44  | Q3 [39.6,48)   | 48  | Q2 [48,54.8)   | 11 | 9  | 14 | Yes | No  | No  |
| 158 | 57 | Female | 700  | 1690 | 245 | 40  | Q3 [39.6,48)   | 56  | Q3 [54.8,63.6) | 12 | 22 | 38 | Yes | No  | No  |
| 159 | 48 | Male   | 645  | 1649 | 237 | 668 | Q4 [48,80]     | 604 | Q3 [54.8,63.6) | 15 | 19 | 24 | No  | No  | No  |

|     |    |        |     |      |     |     |                |     |                |    |    |    |     |     |     |
|-----|----|--------|-----|------|-----|-----|----------------|-----|----------------|----|----|----|-----|-----|-----|
| 160 | 71 | Male   | 780 | 1570 | 316 | 428 | Q3 [39.6,48)   | 56  | Q3 [54.8,63.6) | 12 | 13 | 15 | Yes | No  | No  |
| 161 | 75 | Male   | 560 | 1611 | 216 | 384 | Q2 [32.8,39.6) | 452 | Q1 [32.8,48)   | 13 | 12 | 15 | No  | No  | No  |
| 162 | 35 | Female | 650 | 1702 | 224 | 444 | Q3 [39.6,48)   |     |                | 8  | 23 | 9  | No  | Yes | No  |
| 163 | 57 | Male   | 540 | 1580 | 216 | 332 | Q2 [32.8,39.6) | 54  | Q2 [48,54.8)   | 18 | 19 | 36 | No  | Yes | Yes |
| 164 | 61 | Male   | 540 | 1602 | 211 | 644 | Q4 [48,80]     | 728 | Q4 [63.6,76]   | 8  | 7  | 14 | Yes | Yes | Yes |
| 165 | 62 | Male   | 578 | 1617 | 221 | 28  | Q1 [16,32.8)   | 44  | Q1 [32.8,48)   | 14 | 9  | 11 | No  | No  | No  |
| 166 | 68 | Male   | 550 | 1615 | 211 |     |                | 52  | Q2 [48,54.8)   | 15 | 18 | 15 | No  | No  | No  |
| 167 | 68 | Female | 680 | 1712 | 232 | 392 | Q2 [32.8,39.6) | 48  | Q2 [48,54.8)   | 20 | 16 | 16 | Yes | Yes | No  |
| 168 | 26 | Male   | 430 | 1550 | 179 | 308 | Q1 [16,32.8)   | 48  | Q2 [48,54.8)   | 17 | 27 | 0  | No  | No  | No  |
| 169 | 43 | Male   | 550 | 1611 | 212 | 44  | Q3 [39.6,48)   | 512 | Q2 [48,54.8)   | 13 | 11 | 18 | Yes | No  | No  |
| 170 | 62 | Female | 750 | 1712 | 256 | 28  | Q1 [16,32.8)   | 34  | Q1 [32.8,48)   | 8  | 10 | 12 | No  | No  | No  |
| 171 | 39 | Male   | 640 | 1670 | 229 | 252 | Q1 [16,32.8)   | 38  | Q1 [32.8,48)   | 11 | 8  | 12 | No  | No  | No  |
| 172 | 63 | Male   | 410 | 1610 | 158 | 428 | Q3 [39.6,48)   | 516 | Q2 [48,54.8)   | 8  | 11 | 13 | No  | No  | Yes |
| 173 | 60 | Female | 655 | 1704 | 226 | 48  | Q4 [48,80]     | 64  | Q4 [63.6,76]   | 8  | 6  | 12 | No  | No  | No  |
| 174 | 64 | Female | 641 | 1726 | 215 | 288 | Q1 [16,32.8)   | 496 | Q2 [48,54.8)   | 11 | 12 | 17 | No  | Yes | No  |
| 175 | 56 | Male   | 620 | 1650 | 228 | 48  | Q4 [48,80]     |     |                | 12 | 37 | 34 | No  | Yes | Yes |
| 176 | 40 | Male   | 510 | 1590 | 202 | 464 | Q3 [39.6,48)   |     |                | 12 | 6  | 14 | Yes | No  | No  |
| 177 | 61 | Male   | 490 | 1605 | 190 | 472 | Q3 [39.6,48)   | 624 | Q3 [54.8,63.6) | 18 | 6  | 11 | Yes | Yes | No  |
| 178 | 35 | Female | 710 | 1721 | 240 | 308 | Q1 [16,32.8)   | 48  | Q2 [48,54.8)   | 11 |    | 9  | Yes | No  | No  |
| 179 | 73 | Female | 700 | 1630 | 263 | 48  | Q4 [48,80]     | 66  | Q4 [63.6,76]   | 18 | 11 | 12 | Yes | No  | No  |
| 180 | 58 | Male   | 680 | 1575 | 274 | 44  | Q3 [39.6,48)   | 679 | Q4 [63.6,76]   | 10 | 48 | 38 | No  | Yes | No  |
| 181 | 53 | Female | 650 | 1720 | 220 | 32  | Q1 [16,32.8)   | 48  | Q2 [48,54.8)   | 15 | 18 | 30 | Yes | Yes | No  |
| 182 | 32 | Male   | 700 | 1650 | 257 | 36  | Q2 [32.8,39.6) | 44  | Q1 [32.8,48)   | 8  | 4  | 9  | No  | No  | No  |
| 183 | 59 | Male   | 500 | 1670 | 179 | 38  | Q2 [32.8,39.6) | 52  | Q2 [48,54.8)   | 13 | 35 | 43 | No  | No  | No  |
| 184 | 52 | Male   | 640 | 1637 | 239 | 444 | Q3 [39.6,48)   | 60  | Q3 [54.8,63.6) | 13 | 20 | 27 | Yes | No  | No  |
| 185 | 43 | Female | 652 | 1717 | 221 | 36  | Q2 [32.8,39.6) | 64  | Q4 [63.6,76]   | 12 | 22 | 18 | Yes | No  | Yes |
| 186 | 68 | Male   | 567 | 1616 | 217 | 38  | Q2 [32.8,39.6) | 676 | Q4 [63.6,76]   | 13 | 16 | 15 | Yes | No  | No  |
| 187 | 43 | Male   | 551 | 1604 | 214 | 32  | Q1 [16,32.8)   | 48  | Q2 [48,54.8)   | 18 | 12 | 17 | Yes | No  | No  |
| 188 | 60 | Female | 425 | 1650 | 156 | 36  | Q2 [32.8,39.6) |     |                | 14 | 5  | 13 | No  | Yes | Yes |
| 189 | 48 | Female | 790 | 1730 | 264 | 388 | Q2 [32.8,39.6) | 548 | Q3 [54.8,63.6) | 18 | 5  | 25 | Yes | No  | No  |
| 190 | 61 | Male   | 560 | 1605 | 217 | 28  | Q1 [16,32.8)   | 548 | Q3 [54.8,63.6) | 15 | 6  | 11 | No  | No  | No  |
| 191 | 59 | Male   | 480 | 1550 | 200 | 536 | Q4 [48,80]     | 676 | Q4 [63.6,76]   | 10 | 40 | 43 | No  | Yes | No  |
| 192 | 36 | Female | 730 | 1640 | 271 | 48  | Q4 [48,80]     | 64  | Q4 [63.6,76]   | 12 | 11 | 10 | No  | Yes | No  |

|     |    |        |      |      |     |     |                |     |                |    |    |    |     |     |     |
|-----|----|--------|------|------|-----|-----|----------------|-----|----------------|----|----|----|-----|-----|-----|
| 193 | 49 | Male   | 570  | 1600 | 223 | 28  | Q1 [16,32.8)   | 44  | Q1 [32.8,48)   | 21 | 18 | 26 | Yes | No  | No  |
| 194 | 41 | Female | 600  | 1730 | 200 | 36  | Q2 [32.8,39.6) |     |                | 16 | 8  | 15 | Yes | No  | No  |
| 195 | 27 | Male   | 600  | 1628 | 226 | 40  | Q3 [39.6,48)   | 591 | Q3 [54.8,63.6) | 14 | 5  | 2  | No  | No  | No  |
| 196 | 45 | Male   | 580  | 1600 | 227 | 60  | Q4 [48,80]     | 72  | Q4 [63.6,76]   | 19 | 22 | 20 | Yes | Yes | No  |
| 197 | 35 | Female | 745  | 1715 | 253 | 30  | Q1 [16,32.8)   | 54  | Q2 [48,54.8)   | 8  | 1  | 10 | No  | Yes | No  |
| 198 | 57 | Female | 700  | 1750 | 229 | 44  | Q3 [39.6,48)   | 54  | Q2 [48,54.8)   | 21 | 31 | 35 | No  | Yes | Yes |
| 199 | 66 | Male   | 500  | 1660 | 181 |     |                | 64  | Q4 [63.6,76]   | 11 | 15 | 14 | No  | No  | No  |
| 200 | 47 | Female | 650  | 1680 | 230 |     |                | 64  | Q4 [63.6,76]   | 13 | 30 | 23 | No  | No  | No  |
| 201 | 41 | Male   | 600  | 1680 | 213 | 28  | Q1 [16,32.8)   | 40  | Q1 [32.8,48)   | 12 | 11 | 14 | Yes | No  | No  |
| 202 | 74 | Female | 1050 | 1694 | 366 | 48  | Q4 [48,80]     | 68  | Q4 [63.6,76]   | 17 | 13 | 16 | No  | No  | No  |
| 203 | 45 | Female | 520  | 1676 | 185 | 44  | Q3 [39.6,48)   | 64  | Q4 [63.6,76]   | 18 | 20 | 20 | No  | No  | Yes |
| 204 | 39 | Female | 700  | 1722 | 236 | 344 | Q2 [32.8,39.6) | 404 | Q1 [32.8,48)   | 8  | 6  | 13 | Yes | No  | Yes |
| 205 | 31 | Female | 530  | 1630 | 199 | 424 | Q3 [39.6,48)   | 58  | Q3 [54.8,63.6) | 15 | 6  | 13 | No  | No  | No  |
| 206 | 58 | Male   | 600  | 1619 | 229 | 66  | Q4 [48,80]     | 74  | Q4 [63.6,76]   | 17 | 42 | 42 | No  | No  | No  |
| 207 | 52 | Male   | 450  | 1579 | 180 | 48  | Q4 [48,80]     | 688 | Q4 [63.6,76]   | 19 | 11 | 13 | No  | Yes | Yes |
| 208 | 18 | Female | 690  | 1717 | 236 | 368 | Q2 [32.8,39.6) | 547 | Q2 [48,54.8)   | 10 | 1  | 4  | No  | No  | Yes |
| 209 | 60 | Female | 520  | 1657 | 189 | 44  | Q3 [39.6,48)   | 52  | Q2 [48,54.8)   | 8  | 3  | 10 | Yes | No  | No  |
| 210 | 37 | Female | 700  | 1723 | 236 | 44  | Q3 [39.6,48)   | 52  | Q2 [48,54.8)   | 10 | 6  | 11 | Yes | Yes | No  |
| 211 | 44 | Male   | 554  | 1611 | 213 | 30  | Q1 [16,32.8)   | 452 | Q1 [32.8,48)   | 8  | 8  | 19 | No  | No  | No  |
| 212 | 46 | Female | 580  | 1665 | 209 | 404 | Q3 [39.6,48)   | 676 | Q4 [63.6,76]   | 18 | 23 | 21 | No  | No  | Yes |
| 213 | 43 | Male   | 568  | 1615 | 218 | 30  | Q1 [16,32.8)   | 52  | Q2 [48,54.8)   | 19 | 13 | 16 | Yes | No  | No  |
| 214 | 51 | Male   | 614  | 1619 | 234 | 40  | Q3 [39.6,48)   | 64  | Q4 [63.6,76]   | 16 | 17 | 28 | Yes | No  | No  |
| 215 | 49 | Male   | 490  | 1620 | 187 | 276 | Q1 [16,32.8)   | 36  | Q1 [32.8,48)   | 10 | 17 | 26 | No  | No  | No  |
| 216 | 56 | Male   | 500  | 1589 | 198 | 32  | Q1 [16,32.8)   | 40  | Q1 [32.8,48)   | 14 | 19 | 34 | Yes | Yes | No  |
| 217 | 34 | Female | 680  | 1680 | 241 | 64  | Q4 [48,80]     | 72  | Q4 [63.6,76]   | 11 | 11 | 9  | Yes | Yes | No  |
| 218 | 42 | Female | 600  | 1800 | 185 | 32  | Q1 [16,32.8)   | 56  | Q3 [54.8,63.6) | 19 | 7  | 16 | Yes | No  | No  |
| 219 | 69 | Male   | 547  | 1612 | 210 | 40  | Q3 [39.6,48)   | 52  | Q2 [48,54.8)   | 12 | 19 | 17 | No  | No  | No  |
| 220 | 48 | Male   | 460  | 1550 | 191 | 352 | Q2 [32.8,39.6) | 552 | Q3 [54.8,63.6) | 12 | 21 | 24 | Yes | Yes | No  |
| 221 | 44 | Female | 770  | 1730 | 257 | 44  | Q3 [39.6,48)   | 52  | Q2 [48,54.8)   | 12 | 9  | 19 | Yes | Yes | No  |
| 222 | 31 | Male   | 500  | 1607 | 194 | 48  | Q4 [48,80]     |     |                | 19 | 8  | 8  | Yes | No  | No  |
| 223 | 47 | Female | 700  | 1703 | 241 | 36  | Q2 [32.8,39.6) | 68  | Q4 [63.6,76]   | 15 | 7  | 22 | Yes | Yes | No  |
| 224 | 46 | Male   | 600  | 1631 | 226 | 492 | Q4 [48,80]     | 688 | Q4 [63.6,76]   | 20 | 12 | 21 | Yes | No  | No  |
| 225 | 46 | Female | 650  | 1703 | 224 | 28  | Q1 [16,32.8)   | 44  | Q1 [32.8,48)   | 16 | 15 | 21 | No  | Yes | No  |

|     |    |        |     |      |     |     |                |     |                |    |    |    |     |     |     |
|-----|----|--------|-----|------|-----|-----|----------------|-----|----------------|----|----|----|-----|-----|-----|
| 226 | 38 | Male   | 550 | 1617 | 210 | 436 | Q3 [39.6,48)   | 52  | Q2 [48,54.8)   | 16 | 11 | 11 | Yes | No  | No  |
| 227 | 24 | Female | 680 | 1690 | 238 | 48  | Q4 [48,80]     | 56  | Q3 [54.8,63.6) | 8  | 3  | 4  | Yes | No  | No  |
| 228 | 45 | Female | 650 | 1740 | 215 | 44  | Q3 [39.6,48)   | 68  | Q4 [63.6,76]   | 8  | 15 | 20 | Yes | Yes | No  |
| 229 | 36 | Male   | 510 | 1570 | 207 | 376 | Q2 [32.8,39.6) | 48  | Q2 [48,54.8)   | 12 | 15 | 10 | Yes | No  | No  |
| 230 | 58 | Female | 650 | 1710 | 222 | 412 | Q3 [39.6,48)   | 528 | Q2 [48,54.8)   | 16 | 26 | 43 | Yes | Yes | No  |
| 231 | 37 | Male   | 550 | 1615 | 211 |     |                | 532 | Q2 [48,54.8)   | 15 | 7  | 11 | No  | No  | No  |
| 232 | 45 | Male   | 450 | 1587 | 179 | 30  | Q1 [16,32.8)   | 42  | Q1 [32.8,48)   | 12 | 23 | 20 | Yes | No  | No  |
| 233 | 82 | Female | 600 | 1684 | 212 | 288 | Q1 [16,32.8)   | 396 | Q1 [32.8,48)   | 14 | 10 | 12 | Yes | No  | No  |
| 234 | 69 | Female | 670 | 1706 | 230 | 28  | Q1 [16,32.8)   | 44  | Q1 [32.8,48)   | 13 | 19 | 16 | Yes | Yes | No  |
| 235 | 60 | Male   | 470 | 1560 | 193 | 40  | Q3 [39.6,48)   | 673 | Q4 [63.6,76]   | 8  | 3  | 14 | No  | No  | No  |
| 236 | 46 | Male   | 650 | 1642 | 241 | 40  | Q3 [39.6,48)   | 528 | Q2 [48,54.8)   | 19 | 8  | 21 | Yes | Yes | No  |
| 237 | 60 | Female | 653 | 1744 | 215 | 304 | Q1 [16,32.8)   | 512 | Q2 [48,54.8)   | 13 | 6  | 11 | No  | No  | No  |
| 238 | 53 | Female | 800 | 1730 | 267 | 38  | Q2 [32.8,39.6) | 644 | Q4 [63.6,76]   | 19 | 18 | 30 | Yes | No  | No  |
| 239 | 64 | Male   | 568 | 1623 | 215 | 388 | Q2 [32.8,39.6) | 60  | Q3 [54.8,63.6) | 12 | 18 | 10 | Yes | No  | No  |
| 240 | 46 | Male   | 510 | 1614 | 196 | 80  | Q4 [48,80]     |     |                | 20 | 28 | 20 | Yes | No  | No  |
| 241 | 46 | Male   | 630 | 1660 | 229 | 368 | Q2 [32.8,39.6) | 508 | Q2 [48,54.8)   | 13 | 7  | 21 | Yes | No  | No  |
| 242 | 83 | Female | 720 | 1720 | 243 | 32  | Q1 [16,32.8)   | 40  | Q1 [32.8,48)   | 16 | 14 | 15 | Yes | Yes | No  |
| 243 | 39 | Female | 700 | 1730 | 234 | 396 | Q3 [39.6,48)   | 58  | Q3 [54.8,63.6) | 8  | 2  | 1  | Yes | No  | No  |
| 244 | 50 | Female | 720 | 1760 | 232 |     |                | 50  | Q2 [48,54.8)   | 20 | 25 | 27 | No  | No  | No  |
| 245 | 36 | Male   | 520 | 1606 | 201 |     |                | 48  | Q2 [48,54.8)   | 11 | 5  | 10 | No  | No  | No  |
| 246 | 40 | Female | 660 | 1714 | 225 | 16  | Q1 [16,32.8)   | 36  | Q1 [32.8,48)   | 13 | 4  | 14 | No  | Yes | Yes |
| 247 | 61 | Female | 600 | 1682 | 212 | 36  | Q2 [32.8,39.6) | 64  | Q4 [63.6,76]   | 9  | 8  | 12 | No  | Yes | No  |
| 248 | 48 | Female | 580 | 1687 | 204 | 28  | Q1 [16,32.8)   | 56  | Q3 [54.8,63.6) | 10 | 19 | 25 | Yes | No  | No  |
| 249 | 31 | Male   | 590 | 1614 | 227 | 28  | Q1 [16,32.8)   | 48  | Q2 [48,54.8)   | 17 | 7  | 8  | Yes | No  | No  |
| 250 | 62 | Male   | 450 | 1500 | 200 | 508 | Q4 [48,80]     |     |                | 9  | 9  | 16 | Yes | Yes | No  |
| 251 | 82 | Male   | 600 | 1645 | 222 | 56  | Q4 [48,80]     | 64  | Q4 [63.6,76]   | 11 | 11 | 15 | Yes | No  | No  |
| 252 | 31 | Male   | 480 | 1584 | 191 | 336 | Q2 [32.8,39.6) | 608 | Q3 [54.8,63.6) | 8  | 10 | 7  | Yes | No  | No  |

### Additional file 3. Supplementary Table 1-4

Table S1. Patient demographics and baseline characteristics

| Characteristic                      | Dex-N2 dose            |                          |                        |                      | p-value            |
|-------------------------------------|------------------------|--------------------------|------------------------|----------------------|--------------------|
|                                     | Q1 [16,32.8]<br>N = 59 | Q2 [32.8,39.6]<br>N = 55 | Q3 [39.6,48]<br>N = 63 | Q4 [48,80]<br>N = 60 |                    |
| <b>Gender, n (%)</b>                |                        |                          |                        |                      | 0.412 <sup>1</sup> |
| Male                                | 36 (61.0%)             | 33 (60.0%)               | 30 (47.6%)             | 35 (58.3%)           |                    |
| Female                              | 23 (39.0%)             | 22 (40.0%)               | 33 (52.4%)             | 25 (41.7%)           |                    |
| <b>Age, years, Mean ± SD</b>        | 49 ± 14                | 50 ± 14                  | 48 ± 12                | 52 ± 15              | 0.463 <sup>2</sup> |
| <b>BMI, Median (Q1, Q3)</b>         | 21.42 (19.84, 22.42)   | 22.12 (20.74, 23.94)     | 22.75 (20.81, 24.22)   | 22.76 (21.05, 24.78) | 0.002 <sup>3</sup> |
| <b>PSQI Score, Median (Q1, Q3)</b>  | 14.0 (11.0, 17.0)      | 13.0 (10.0, 17.0)        | 14.0 (10.0, 18.0)      | 13.0 (11.0, 17.0)    | 0.895 <sup>3</sup> |
| <b>MADRS Score, Median (Q1, Q3)</b> | 12 (7, 19)             | 15 (7, 20)               | 12 (9, 20)             | 12 (10, 21)          | 0.695 <sup>3</sup> |
| Missing                             | 1                      | 0                        | 1                      | 0                    |                    |
| <b>HAMA Score, Median (Q1, Q3)</b>  | 15 (11, 25)            | 18 (12, 30)              | 18 (13, 29)            | 16 (12, 24)          | 0.205 <sup>3</sup> |
| <b>Hypnotics use, n (%)</b>         | 37 (62.7%)             | 34 (61.8%)               | 40 (63.5%)             | 37 (61.7%)           | 0.997 <sup>1</sup> |
| <b>Antidepressant use, n (%)</b>    | 19 (32.2%)             | 20 (36.4%)               | 23 (36.5%)             | 28 (46.7%)           | 0.411 <sup>1</sup> |
| <b>Antipsychotics use, n (%)</b>    | 5 (8.5%)               | 13 (23.6%)               | 11 (17.5%)             | 11 (18.3%)           | 0.182 <sup>1</sup> |

<sup>1</sup>Pearson's Chi-squared test

<sup>2</sup>One-way analysis of means

<sup>3</sup>Kruskal-Wallis rank sum test

Table S2. Patient demographics and baseline characteristics

| Characteristic                      | Dex-N3 dose            |                        |                          |                        | p-value            |
|-------------------------------------|------------------------|------------------------|--------------------------|------------------------|--------------------|
|                                     | Q1 [32.8,48]<br>N = 50 | Q2 [48,54.8]<br>N = 64 | Q3 [54.8,63.6]<br>N = 59 | Q4 [63.6,76]<br>N = 58 |                    |
| <b>Gender, n (%)</b>                |                        |                        |                          |                        | 0.577 <sup>1</sup> |
| Male                                | 32 (64.0%)             | 39 (60.9%)             | 36 (61.0%)               | 30 (51.7%)             |                    |
| Female                              | 18 (36.0%)             | 25 (39.1%)             | 23 (39.0%)               | 28 (48.3%)             |                    |
| <b>Age, years, Mean ± SD</b>        | 51 ± 14                | 49 ± 14                | 49 ± 14                  | 51 ± 15                | 0.834 <sup>2</sup> |
| <b>BMI, Median (Q1, Q3)</b>         | 21.81 (20.81, 23.01)   | 21.57 (20.26, 23.60)   | 22.75 (20.81, 24.22)     | 22.44 (20.93, 24.13)   | 0.091 <sup>3</sup> |
| <b>PSQI Score, Median (Q1, Q3)</b>  | 13.0 (10.0, 15.0)      | 13.0 (11.0, 17.0)      | 14.0 (12.0, 17.0)        | 13.0 (11.0, 16.0)      | 0.223 <sup>3</sup> |
| <b>MADRS Score, Median (Q1, Q3)</b> | 12 (8, 19)             | 13 (7, 22)             | 13 (7, 19)               | 12 (10, 18)            | 0.994 <sup>3</sup> |
| Missing                             | 0                      | 1                      | 1                        | 0                      |                    |
| <b>HAMA Score, Median (Q1, Q3)</b>  | 16 (12, 26)            | 17 (11, 29)            | 16 (11, 27)              | 16 (12, 22)            | 0.951 <sup>3</sup> |
| <b>Hypnotics use, n (%)</b>         | 26 (52.0%)             | 40 (62.5%)             | 38 (64.4%)               | 30 (51.7%)             | 0.361 <sup>1</sup> |
| <b>Antidepressant use, n (%)</b>    | 15 (30.0%)             | 24 (37.5%)             | 21 (35.6%)               | 19 (32.8%)             | 0.848 <sup>1</sup> |
| <b>Antipsychotics use, n (%)</b>    | 8 (16.0%)              | 12 (18.8%)             | 6 (10.2%)                | 10 (17.2%)             | 0.587 <sup>1</sup> |

<sup>1</sup>Pearson's Chi-squared test<sup>2</sup>One-way analysis of means<sup>3</sup>Kruskal-Wallis rank sum test

Table S3. Univariate and multivariate analysis of Independent Clinical Factors Influencing Dex-N2 dose (Linear regression)

| Characteristic            | Univariable |      |             |         | Multivariable |      |             |         |
|---------------------------|-------------|------|-------------|---------|---------------|------|-------------|---------|
|                           | N           | Beta | 95% CI      | p-value | N             | Beta | 95% CI      | p-value |
| <b>Age</b>                | 237         | 0.06 | -0.04, 0.17 | 0.242   |               |      |             |         |
| <b>Gender</b>             |             |      |             |         |               |      |             |         |
| Male                      | 134         | —    | —           |         |               |      |             |         |
| Female                    | 103         | 1.02 | -1.93, 3.97 | 0.497   |               |      |             |         |
| <b>BMI</b>                | 237         | 0.71 | 0.25, 1.17  | 0.003   | 235           | 0.71 | 0.25, 1.17  | 0.003   |
| <b>MADRS Score</b>        | 235         | 0.20 | 0.04, 0.36  | 0.015   | 235           | 0.17 | 0.01, 0.34  | 0.041   |
| <b>PSQI Score</b>         | 237         | 0.13 | -0.25, 0.52 | 0.499   |               |      |             |         |
| <b>HAMA Score</b>         | 237         | 0.04 | -0.09, 0.18 | 0.545   |               |      |             |         |
| <b>Hypnotics use</b>      |             |      |             |         |               |      |             |         |
| No                        | 89          | —    | —           |         |               |      |             |         |
| Yes                       | 148         | 1.02 | -1.99, 4.04 | 0.507   |               |      |             |         |
| <b>Antidepressant use</b> |             |      |             |         |               |      |             |         |
| No                        | 147         | —    | —           |         | 145           | —    | —           |         |
| Yes                       | 90          | 3.18 | 0.19, 6.17  | 0.038   | 90            | 2.04 | -1.03, 5.12 | 0.192   |
| <b>Antipsychotics use</b> |             |      |             |         |               |      |             |         |
| No                        | 197         | —    | —           |         |               |      |             |         |
| Yes                       | 40          | 1.22 | -2.68, 5.12 | 0.541   |               |      |             |         |

Abbreviation: CI = Confidence Interval

R<sup>2</sup> = 0.071; Adjusted R<sup>2</sup> = 0.059; Sigma = 11.1; Statistic = 5.90; p-value = <0.001; df = 3; Log-likelihood = -898; AIC = 1,806; BIC = 1,823; Deviance = 28,697; Residual df = 231; No. Obs. = 235

Table S4. Univariate and multivariate analysis of Independent Clinical Factors Influencing Dex-N3 dose (Linear regression)

| Characteristic            | Univariable |       |             |         | Multivariable |      |            |         |
|---------------------------|-------------|-------|-------------|---------|---------------|------|------------|---------|
|                           | N           | Beta  | 95% CI      | p-value | N             | Beta | 95% CI     | p-value |
| <b>Age</b>                | 231         | 0.02  | -0.07, 0.11 | 0.654   |               |      |            |         |
| <b>Gender</b>             |             |       |             |         |               |      |            |         |
| Male                      | 137         | —     | —           |         |               |      |            |         |
| Female                    | 94          | 1.54  | -1.04, 4.11 | 0.244   |               |      |            |         |
| <b>BMI</b>                | 231         | 0.48  | 0.07, 0.89  | 0.022   | 231           | 0.48 | 0.07, 0.89 | 0.022   |
| <b>PSQI Score</b>         | 231         | 0.24  | -0.10, 0.58 | 0.170   |               |      |            |         |
| <b>MADRS Score</b>        | 229         | 0.02  | -0.13, 0.17 | 0.813   |               |      |            |         |
| <b>HAMA Score</b>         | 231         | -0.03 | -0.15, 0.09 | 0.611   |               |      |            |         |
| <b>Hypnotics use</b>      |             |       |             |         |               |      |            |         |
| No                        | 97          | —     | —           |         |               |      |            |         |
| Yes                       | 134         | -0.28 | -2.85, 2.30 | 0.834   |               |      |            |         |
| <b>Antidepressant use</b> |             |       |             |         |               |      |            |         |
| No                        | 152         | —     | —           |         |               |      |            |         |
| Yes                       | 79          | 0.60  | -2.08, 3.27 | 0.663   |               |      |            |         |
| <b>Antipsychotics use</b> |             |       |             |         |               |      |            |         |
| No                        | 195         | —     | —           |         |               |      |            |         |
| Yes                       | 36          | 0.52  | -2.98, 4.02 | 0.772   |               |      |            |         |

Abbreviation: CI = Confidence Interval

R<sup>2</sup> = 0.023; Adjusted R<sup>2</sup> = 0.019; Sigma = 9.74; Statistic = 5.35; p-value = 0.022; df = 1; Log-likelihood = -853; AIC = 1,711; BIC = 1,721; Deviance = 21,712; Residual df = 229; No. Obs. = 231
